# Supplementary material for: Experimental evidence that chronic outgroup conflict reduces reproductive success in a cooperatively breeding fish
Source: eLife. 2022 Sep 14;11:e72567. doi: 10.7554/eLife.72567 (PMC9473690; doi:10.7554/eLife.72567)
Supplement: Figure 2—source data 1. [file elife-72567-fig2-data1.xlsx]

## Sheet: Figure 2a
Pair	Group	Treatment	Week	Defence
1	1	Control	Week 1	18
1	3	Intruded	Week 1	65
2	4	Control	Week 1	37
2	6	Intruded	Week 1	168
3	7	Intruded	Week 1	43
3	9	Control	Week 1	9
4	10	Intruded	Week 1	191
4	12	Control	Week 1	44
5	13	Intruded	Week 1	105
5	15	Control	Week 1	20
6	16	Intruded	Week 1	68
6	18	Control	Week 1	35
7	19	Control	Week 1	25
7	21	Intruded	Week 1	53
8	22	Intruded	Week 1	80
8	24	Control	Week 1	17
9	25	Intruded	Week 1	145
9	27	Control	Week 1	5
10	28	Intruded	Week 1	41
10	30	Control	Week 1	5
1	1	Control	Week 11	0
1	3	Intruded	Week 11	163
2	4	Control	Week 11	16
2	6	Intruded	Week 11	151
3	7	Intruded	Week 11	33
3	9	Control	Week 11	100
4	10	Intruded	Week 11	325
4	12	Control	Week 11	39
5	13	Intruded	Week 11	122
5	15	Control	Week 11	61
6	16	Intruded	Week 11	121
6	18	Control	Week 11	8
7	19	Control	Week 11	0
7	21	Intruded	Week 11	157
8	22	Intruded	Week 11	244
8	24	Control	Week 11	100
9	25	Intruded	Week 11	223
9	27	Control	Week 11	8
10	28	Intruded	Week 11	99
10	30	Control	Week 11	17

## Sheet: Figure 2b
Group	Week	ID	Individual	Defence
3	Week 1	46	DF	39
3	Week 1	47	DM	26
3	Week 1	48	S	0
3	Week 11	46	DF	69
3	Week 11	47	DM	91
3	Week 11	48	S	3
6	Week 1	52	DF	144
6	Week 1	53	DM	7
6	Week 11	52	DF	151
6	Week 11	53	DM	0
7	Week 1	55	DF	19
7	Week 1	56	DM	14
7	Week 11	55	DF	23
7	Week 11	56	DM	10
10	Week 1	1	DF	90
10	Week 1	2	DM	94
10	Week 1	3	S	7
10	Week 11	1	DF	132
10	Week 11	2	DM	172
10	Week 11	3	S	21
13	Week 1	7	DF	11
13	Week 1	8	DM	81
13	Week 1	9	S	13
13	Week 11	7	DF	8
13	Week 11	8	DM	112
13	Week 11	9	S	2
16	Week 1	13	DF	44
16	Week 1	14	DM	14
16	Week 1	15	S	10
16	Week 11	13	DF	93
16	Week 11	14	DM	23
16	Week 11	15	S	5
21	Week 1	25	DF	32
21	Week 1	26	DM	18
21	Week 11	25	DF	34
21	Week 11	26	DM	123
22	Week 1	28	DF	51
22	Week 1	29	DM	28
22	Week 11	28	DF	190
22	Week 11	29	DM	54
25	Week 1	34	DF	29
25	Week 1	35	DM	116
25	Week 1	36	S	0
25	Week 11	34	DF	27
25	Week 11	35	DM	196
25	Week 11	36	S	0
28	Week 1	40	DF	32
28	Week 1	41	DM	9
28	Week 1	42	S	0
28	Week 11	40	DF	49
28	Week 11	41	DM	50
28	Week 11	42	S	0
