# Supplementary material for: Experimental evidence that chronic outgroup conflict reduces reproductive success in a cooperatively breeding fish
Source: eLife. 2022 Sep 14;11:e72567. doi: 10.7554/eLife.72567 (PMC9473690; doi:10.7554/eLife.72567)
Supplement: Figure 3—source data 1. [file elife-72567-fig3-data1.xlsx]

## Sheet: Figure 3a
Pair	Group	Treatment	Inter-clutch-interval	Female size
1	1	Control	24	50
1	1	Control	28	57
1	3	Intruded	28	58
2	6	Intruded	44	62
3	7	Intruded	51	61
3	9	Control	24	54
4	10	Intruded	18	45
4	10	Intruded	22	52
4	12	Control	15	59
4	12	Control	15	59
5	15	Control	12	58
5	15	Control	13	64
5	15	Control	20	64
6	18	Control	26	48
6	18	Control	30	60
7	19	Control	13	47
7	21	Intruded	19	55
8	24	Control	27	55
8	24	Control	29	58
9	25	Intruded	26	57
9	25	Intruded	24	59

## Sheet: Figure 3b
Pair	Group	Clutch size	Treatment	Treatment duration	Female size
1	1	149	Control	7	50
1	1	93	Control	31	50
1	1	146	Control	59	57
1	3	56	Intruded	13	49
1	3	134	Intruded	42	49
2	6	127	Intruded	3	58
2	6	202	Intruded	47	62
3	7	155	Intruded	14	61
3	7	244	Intruded	65	61
3	9	53	Control	42	60
3	9	38	Control	66	54
4	10	72	Intruded	21	45
4	10	84	Intruded	39	45
4	10	138	Intruded	61	52
4	12	111	Control	53	59
4	12	91	Control	68	59
4	12	102	Control	83	59
5	15	27	Control	3	58
5	15	48	Control	24	58
5	15	61	Control	57	62
5	15	79	Control	72	62
6	18	70	Control	12	48
6	18	54	Control	38	48
6	18	131	Control	68	60
7	19	28	Control	43	49
7	19	89	Control	56	47
7	21	46	Intruded	51	55
7	21	78	Intruded	70	55
8	24	108	Control	12	55
8	24	98	Control	39	55
8	24	179	Control	68	58
9	25	67	Intruded	4	57
9	25	145	Intruded	30	57
9	25	101	Intruded	54	59

## Sheet: Figure 3c
Pair	Group	Treatment	Egg volume	Treatment duration	Female size	Clutch size
1	1	Control	0.75	15	62	109
1	1	Control	1.29	15	62	109
1	1	Control	1.05	15	62	109
1	1	Control	1.33	15	62	109
1	1	Control	0.92	15	62	109
1	1	Control	1.72	15	62	109
1	1	Control	0.77	15	62	109
1	1	Control	0.92	15	62	109
1	1	Control	0.72	15	62	109
1	1	Control	1.25	15	62	109
1	3	Intruded	3.94	23	62	105
1	3	Intruded	2.56	23	62	105
1	3	Intruded	1.89	23	62	105
1	3	Intruded	2	23	62	105
1	3	Intruded	1.51	23	62	105
1	3	Intruded	3.83	23	62	105
1	3	Intruded	2.96	23	62	105
1	3	Intruded	1.94	23	62	105
1	3	Intruded	3.83	23	62	105
1	3	Intruded	2.2	23	62	105
2	4	Control	3.05	44	65	166
2	4	Control	3.05	44	65	166
2	4	Control	3.14	44	65	166
2	4	Control	3.32	44	65	166
2	4	Control	2.96	44	65	166
2	4	Control	2.48	44	65	166
2	4	Control	1.89	44	65	166
2	4	Control	3.15	44	65	166
2	4	Control	2.34	44	65	166
2	4	Control	2.27	44	65	166
2	6	Intruded	3.05	57	68	353
2	6	Intruded	3.14	57	68	353
2	6	Intruded	3.05	57	68	353
2	6	Intruded	5.18	57	68	353
2	6	Intruded	3.14	57	68	353
2	6	Intruded	2.63	57	68	353
2	6	Intruded	3.23	57	68	353
2	6	Intruded	1.89	57	68	353
2	6	Intruded	1.72	57	68	353
2	6	Intruded	2.2	57	68	353
3	9	Control	2.34	19	65	130
3	9	Control	2.48	19	65	130
3	9	Control	1.94	19	65	130
3	9	Control	1.46	19	65	130
3	9	Control	2.56	19	65	130
3	9	Control	1.89	19	65	130
3	9	Control	1.83	19	65	130
3	9	Control	2.56	19	65	130
3	9	Control	2.56	19	65	130
3	9	Control	1.94	19	65	130
4	12	Intruded	1.72	41	46	61
4	12	Intruded	1.67	41	46	61
4	12	Intruded	1.56	41	46	61
4	12	Intruded	1.38	41	46	61
4	12	Intruded	1.38	41	46	61
4	12	Intruded	1.42	41	46	61
4	12	Intruded	2.34	41	46	61
4	12	Intruded	1.38	41	46	61
4	12	Intruded	1.05	41	46	61
4	12	Intruded	1.29	41	46	61
5	15	Control	4.76	40	67	216
5	15	Control	4.05	40	67	216
5	15	Control	4.9	40	67	216
5	15	Control	3.14	40	67	216
5	15	Control	2.96	40	67	216
5	15	Control	3.94	40	67	216
5	15	Control	3.05	40	67	216
5	15	Control	2.96	40	67	216
5	15	Control	3.32	40	67	216
5	15	Control	2.41	40	67	216
6	16	Control	1.46	17	56	80
6	16	Control	1.78	17	56	80
6	16	Control	2.06	17	56	80
6	16	Control	2	17	56	80
6	16	Control	1.83	17	56	80
6	16	Control	2.48	17	56	80
6	16	Control	1.83	17	56	80
6	16	Control	2.48	17	56	80
6	16	Control	2	17	56	80
6	16	Control	1.83	17	56	80
6	18	Intruded	2.34	56	65	76
6	18	Intruded	1.89	56	65	76
6	18	Intruded	2.2	56	65	76
6	18	Intruded	2.34	56	65	76
6	18	Intruded	2.27	56	65	76
6	18	Intruded	1.83	56	65	76
6	18	Intruded	1.78	56	65	76
6	18	Intruded	1.83	56	65	76
6	18	Intruded	2.41	56	65	76
6	18	Intruded	3.05	56	65	76
7	19	Intruded	1.05	32	76	290
7	19	Intruded	2.41	32	76	290
7	19	Intruded	3.49	32	76	290
7	19	Intruded	2.41	32	76	290
7	19	Intruded	2.96	32	76	290
7	19	Intruded	3.6	32	76	290
7	19	Intruded	3.49	32	76	290
7	19	Intruded	3.23	32	76	290
7	19	Intruded	2.87	32	76	290
7	19	Intruded	3.14	32	76	290
7	19	Intruded	0.72	32	76	290
7	19	Intruded	0.54	32	76	290
7	19	Intruded	0.38	32	76	290
7	19	Intruded	1.29	32	76	290
7	19	Intruded	1.21	32	76	290
7	19	Intruded	0.52	32	76	290
7	19	Intruded	0.54	32	76	290
7	19	Intruded	0.75	32	76	290
7	19	Intruded	1.25	32	76	290
7	19	Intruded	0.56	32	76	290
7	19	Intruded	0.72	32	76	290
7	19	Intruded	0.92	32	76	290
7	21	Control	1.94	23	73	209
7	21	Control	3.05	23	73	209
7	21	Control	5.04	23	73	209
7	21	Control	3.83	23	73	209
7	21	Control	3.05	23	73	209
7	21	Control	2.41	23	73	209
7	21	Control	1.15	23	73	209
7	21	Control	3.6	23	73	209
7	21	Control	1.94	23	73	209
7	21	Control	1.83	23	73	209
8	24	Control	1.83	28	61	178
8	24	Control	1.67	28	61	178
8	24	Control	0.72	28	61	178
8	24	Control	1.89	28	61	178
8	24	Control	2.06	28	61	178
8	24	Control	2.48	28	61	178
8	24	Control	1.25	28	61	178
8	24	Control	1.29	28	61	178
8	24	Control	2.48	28	61	178
8	24	Control	1.89	28	61	178
8	24	Control	2	28	61	178
8	24	Control	0.92	28	61	178
8	24	Control	1.89	28	61	178
8	24	Control	1.78	28	61	178
8	24	Control	1.94	28	61	178
8	24	Control	2	28	61	178
8	24	Control	2.27	28	61	178
8	24	Control	1.89	28	61	178
8	24	Control	1.94	28	61	178
8	24	Control	1.55	28	61	178
9	25	Control	1.78	24	63	132
9	25	Control	1.15	24	63	132
9	25	Control	2.48	24	63	132
9	25	Control	2.27	24	63	132
9	25	Control	1.78	24	63	132
9	25	Control	1.42	24	63	132
9	25	Control	1.78	24	63	132
9	25	Control	2.34	24	63	132
9	25	Control	1.05	24	63	132
9	25	Control	1.09	24	63	132
9	27	Intruded	0.76	14	62	119
9	27	Intruded	1.15	14	62	119
9	27	Intruded	2.41	14	62	119
9	27	Intruded	3.14	14	62	119
9	27	Intruded	1.46	14	62	119
9	27	Intruded	1.42	14	62	119
9	27	Intruded	1.94	14	62	119
9	27	Intruded	1.51	14	62	119
9	27	Intruded	2.56	14	62	119
9	27	Intruded	3.14	14	62	119
10	30	Control	1.83	18	70	153
10	30	Control	2.34	18	70	153
10	30	Control	0.96	18	70	153
10	30	Control	2.34	18	70	153
10	30	Control	1.72	18	70	153
10	30	Control	0.99	18	70	153
10	30	Control	1.46	18	70	153
10	30	Control	3.05	18	70	153
10	30	Control	1.29	18	70	153
10	30	Control	1.33	18	70	153

## Sheet: Figure 3d
Pair	Group	Egg proteins	Treatment	Treatment duration	Female size	Clutch size
1	1	124.33	Control	15	62	109
1	1	119.78	Control	15	62	109
1	3	135.91	Intruded	23	62	105
1	3	146.9	Intruded	23	62	105
2	4	132.99	Control	44	65	166
2	4	130.48	Control	44	65	166
2	6	117.75	Intruded	57	68	353
2	6	120.35	Intruded	57	68	353
3	9	137.79	Control	19	65	130
3	9	131.73	Control	19	65	130
4	12	101.26	Intruded	41	46	61
4	12	101.4	Intruded	41	46	61
5	15	132.7	Control	40	67	216
5	15	140.12	Control	40	67	216
6	16	123.46	Control	17	56	80
6	16	125.95	Control	17	56	80
6	18	79.63	Intruded	56	65	76
6	18	85.93	Intruded	56	65	76
7	19	130.55	Intruded	32	76	290
7	19	132.22	Intruded	32	76	290
7	21	137.79	Control	23	73	209
7	21	137.21	Control	23	73	209
8	24	127.68	Control	28	61	178
8	24	130	Control	28	61	178
9	25	99.72	Control	24	63	132
9	25	94.32	Control	24	63	132
9	27	132.43	Intruded	14	62	119
9	27	133.01	Intruded	14	62	119
10	30	112.45	Control	18	70	153
10	30	111.39	Control	18	70	153
