# Supplementary material for: Experimental evidence that chronic outgroup conflict reduces reproductive success in a cooperatively breeding fish
Source: eLife. 2022 Sep 14;11:e72567. doi: 10.7554/eLife.72567 (PMC9473690; doi:10.7554/eLife.72567)
Supplement: Figure 4—source data 1. [file elife-72567-fig4-data1.xlsx]

## Sheet: Figure 4a
Pair	Group	Treatment	Clutch visits	Treatment duration	Clutch size
1	1	Control	17	59	146
1	1	Control	21	31	93
1	1	Control	29	7	149
1	3	Intruded	17	13	56
1	3	Intruded	34	42	134
2	6	Intruded	11	3	127
2	6	Intruded	17	47	202
3	7	Intruded	32	65	244
3	7	Intruded	28	14	155
3	9	Control	35	66	38
3	9	Control	37	42	53
4	10	Intruded	59	61	138
4	10	Intruded	27	39	84
4	10	Intruded	42	21	72
4	12	Control	22	68	91
4	12	Control	16	83	102
5	15	Control	23	57	61
5	15	Control	33	24	48
5	15	Control	28	3	27
5	15	Control	31	72	79
6	18	Control	46	68	131
6	18	Control	28	38	54
6	18	Control	14	12	72
7	19	Control	17	56	89
7	19	Control	15	43	28
7	21	Intruded	27	51	46
7	21	Intruded	40	70	78
8	24	Control	19	68	179
8	24	Control	18	39	98
8	24	Control	37	12	108
9	25	Intruded	20	54	101
9	25	Intruded	33	30	145
9	25	Intruded	11	4	67

## Sheet: Figure 4b
Pair	Group	Treatment	Caring events	Treatment duration	Clutch size
1	1	Control	28	59	146
1	1	Control	20	31	93
1	1	Control	38	7	149
1	3	Intruded	10	13	56
1	3	Intruded	29	42	134
2	6	Intruded	5	3	127
2	6	Intruded	23	47	202
3	7	Intruded	21	65	244
3	7	Intruded	22	14	155
3	9	Control	43	66	38
3	9	Control	56	42	53
4	10	Intruded	87	61	138
4	10	Intruded	24	39	84
4	10	Intruded	23	21	72
4	12	Control	18	68	91
4	12	Control	28	83	102
5	15	Control	9	57	61
5	15	Control	18	24	48
5	15	Control	17	3	27
5	15	Control	22	72	79
6	18	Control	38	68	131
6	18	Control	27	38	54
6	18	Control	11	12	72
7	19	Control	42	56	89
7	19	Control	21	43	28
7	21	Intruded	27	51	46
7	21	Intruded	32	70	78
8	24	Control	17	68	179
8	24	Control	16	39	98
8	24	Control	18	12	108
9	25	Intruded	16	54	101
9	25	Intruded	24	30	145
9	25	Intruded	12	4	67

## Sheet: Figure 4c
Pair	Group	Treatment	Hatching success (%)	Treatment duration	Clutch size
1	1	Control	0	7	149
1	1	Control	45.9	59	146
1	3	Intruded	83.6	42	134
2	9	Control	77.4	42	53
3	10	Intruded	59.7	21	72
3	10	Intruded	21.4	39	84
3	10	Intruded	39.9	61	138
3	12	Control	0	53	111
3	12	Control	0	68	91
3	12	Control	0	83	102
4	15	Control	100	3	27
4	15	Control	95.8	24	48
4	15	Control	55.7	57	61
4	15	Control	58.2	72	79
5	18	Control	59.5	68	131
6	19	Control	3.6	43	28
6	19	Control	80.9	56	89
6	21	Intruded	32.6	51	46
6	21	Intruded	0	70	78
7	25	Intruded	71.6	4	67
7	25	Intruded	79.2	54	101
