# Supplementary material for: Experimental evidence that chronic outgroup conflict reduces reproductive success in a cooperatively breeding fish
Source: eLife. 2022 Sep 14;11:e72567. doi: 10.7554/eLife.72567 (PMC9473690; doi:10.7554/eLife.72567)
Supplement: Figure 5—source data 1. [file elife-72567-fig5-data1.xlsx]

## Sheet: Figure 5a
Pair	Group	Treatment	Survival counts	Treatment duration	Clutch size
1	1	Control	0	37	149
1	1	Control	8	61	93
1	1	Control	36	89	146
1	3	Intruded	37	43	56
1	3	Intruded	52	72	134
2	6	Intruded	60	33	127
2	6	Intruded	16	77	202
3	7	Intruded	62	44	155
3	7	Intruded	24	95	244
3	9	Control	30	72	53
3	9	Control	9	96	38
4	10	Intruded	0	51	72
4	10	Intruded	11	69	84
4	10	Intruded	3	91	138
4	12	Control	0	83	111
4	12	Control	0	98	91
4	12	Control	0	113	102
5	15	Control	10	33	27
5	15	Control	1	54	48
5	15	Control	3	87	61
6	18	Control	20	42	70
6	18	Control	11	68	54
6	18	Control	70	98	131
7	19	Control	1	73	28
7	19	Control	70	86	89
7	21	Intruded	10	81	46
7	21	Intruded	0	100	78
8	24	Control	17	42	108
8	24	Control	35	69	98
9	25	Intruded	17	34	67
9	25	Intruded	35	60	145
9	25	Intruded	12	84	101

## Sheet: Figure 5b
Pair	Group	Treatment	Latency	Treatment duration	Pre-stimulus activity	# Fry in test	Mean fry size
1	1	Control	33	61	0.87	8	11.97
1	1	Control	18	89	0.55	10	9.72
1	3	Intruded	42	43	0.82	10	7.73
1	3	Intruded	7	72	0.62	10	5.79
2	6	Intruded	12	33	0.93	10	7.57
2	6	Intruded	20	77	0.51	10	7.44
3	7	Intruded	28	44	0.85	10	8.22
3	7	Intruded	6	95	0.91	10	6.09
3	9	Control	12	72	0.97	10	9.05
3	9	Control	38	96	0.39	9	8.91
4	10	Intruded	22	69	0.93	10	9.93
5	15	Control	13	33	0.91	10	11.51
6	18	Control	15	42	0.96	10	8.17
6	18	Control	6	68	0.84	10	7.42
7	19	Control	58	73	0.51	10	8.71
7	21	Intruded	15	81	0.85	10	8.38
8	24	Control	20	42	0.58	10	9.24
8	24	Control	33	69	0.27	10	9.57
9	25	Intruded	40	34	0.82	10	9.02
9	25	Intruded	30	60	0.79	5	7.18
9	25	Intruded	19	84	0.39	10	6.19

## Sheet: Figure 5c
Pair	Group	Treatment	Treatment duration	Mean length	# Surviving offspring
1	1	Control	61	11.97	8
1	1	Control	89	9.72	36
1	3	Intruded	43	7.73	37
1	3	Intruded	72	5.79	52
2	6	Intruded	33	7.57	60
2	6	Intruded	77	7.44	16
3	7	Intruded	44	8.22	62
3	7	Intruded	95	6.09	24
3	9	Control	72	9.05	30
3	9	Control	96	8.91	9
4	10	Intruded	69	9.93	11
4	10	Intruded	91	9.17	3
5	15	Control	33	11.51	10
5	15	Control	54	10.59	1
6	18	Control	42	8.17	20
6	18	Control	68	7.42	11
7	19	Control	73	9.37	1
7	19	Control	86	8.71	70
7	21	Intruded	81	8.38	10
8	24	Control	42	9.24	17
8	24	Control	69	9.57	35
9	25	Intruded	34	9.02	17
9	25	Intruded	60	7.18	35
9	25	Intruded	84	6.19	12

## Sheet: Figure 5d
Pair	Group	Treatment	Treatment duration	Mean weight	# Surviving offspring
1	1	Control	61	6.96	8
1	1	Control	89	2.82	36
1	3	Intruded	43	2.81	37
1	3	Intruded	72	1.26	52
2	6	Intruded	33	3.1	60
2	6	Intruded	77	1.2	16
3	7	Intruded	44	1.98	62
3	7	Intruded	95	2.48	24
3	9	Control	72	2.68	30
3	9	Control	96	2.8	9
4	10	Intruded	69	5.14	11
4	10	Intruded	91	7	3
5	15	Control	33	8.19	10
5	15	Control	54	8.3	1
6	18	Control	42	3.09	20
6	18	Control	68	2.44	11
7	19	Control	73	5.05	1
7	19	Control	86	4.73	70
7	21	Intruded	81	4.57	10
8	24	Control	42	4.32	17
8	24	Control	69	6.2	35
9	25	Intruded	34	4.59	17
9	25	Intruded	60	3.26	35
9	25	Intruded	84	2.69	12
