# Supplementary material for: Experimental evidence that chronic outgroup conflict reduces reproductive success in a cooperatively breeding fish
Source: eLife. 2022 Sep 14;11:e72567. doi: 10.7554/eLife.72567 (PMC9473690; doi:10.7554/eLife.72567)
Supplement: Source data 1. [file elife-72567-data1.xlsx]

## Sheet: Defensive actions
EXPERIMENT I:	Intruder responsiveness:	Group_1	Weeks	Responsiveness	Group defence:	Group_2	Treatment	Week 1	Week11	Defensive actions by individual class:	Group_3	Weeks_2	ID	Individual	Defensive acts	Responsiveness = Proportion of time facing and resposive to focal group
	(within 10-min intrusion)	10	Week 11	0.78	(within 10-min intrusion)	1	Control	18	0	(Intruded treatment only)	3	Week 1	46	DF	39	Week 1 = Number of defensive acts displayed by group during intrusion recorded in week 1 of study
		10	Week 1	0.68		3	Intruded	65	163	(within 10-min intrusion)	3	Week 1	47	DM	26	Week 11 = Number of defensive acts displayed by group during intrusion recorded in week 11 of study
		13	Week 11	0.4		4	Control	37	16		3	Week 1	48	S	0	ID = Individual ID code
		13	Week 1	0.33		6	Intruded	168	151		3	Week 11	46	DF	69	Defensive acts = Number of defensive acts displayed towards intruder
		16	Week 11	0.53		7	Intruded	43	33		3	Week 11	47	DM	91
		16	Week 1	0.95		9	Control	9	100		3	Week 11	48	S	3
		21	Week 11	0.57		10	Intruded	191	325		6	Week 1	52	DF	144
		21	Week 1	0.22		12	Control	44	39		6	Week 1	53	DM	7
		22	Week 11	0.23		13	Intruded	105	122		6	Week 1	54	S	17
		22	Week 1	0.48		15	Control	20	61		6	Week 11	52	DF	151
		25	Week 11	0.78		16	Intruded	68	121		6	Week 11	53	DM	0
		25	Week 1	0.76		18	Control	35	8		7	Week 1	55	DF	19
		28	Week 11	0.26		19	Control	25	0		7	Week 1	56	DM	14
		28	Week 1	0.21		21	Intruded	53	157		7	Week 1	57	S	10
		3	Week 11	0.17		22	Intruded	80	244		7	Week 11	55	DF	23
		3	Week 1	0.52		24	Control	17	100		7	Week 11	56	DM	10
		6	Week 11	0.49		25	Intruded	145	223		10	Week 1	1	DF	90
		6	Week 1	0.41		27	Control	5	8		10	Week 1	2	DM	94
		7	Week 11	0.58		28	Intruded	41	99		10	Week 1	3	S	7
		7	Week 1	0.64		30	Control	5	17		10	Week 11	1	DF	132
											10	Week 11	2	DM	172
											10	Week 11	3	S	21
											13	Week 1	7	DF	11
											13	Week 1	8	DM	81
											13	Week 1	9	S	13
											13	Week 11	7	DF	8
											13	Week 11	8	DM	112
											13	Week 11	9	S	2
											16	Week 1	13	DF	44
											16	Week 1	14	DM	14
											16	Week 1	15	S	10
											16	Week 11	13	DF	93
											16	Week 11	14	DM	23
											16	Week 11	15	S	5
											21	Week 1	25	DF	32
											21	Week 1	26	DM	18
											21	Week 1	27	S	3
											21	Week 11	25	DF	34
											21	Week 11	26	DM	123
											22	Week 1	28	DF	51
											22	Week 1	29	DM	28
											22	Week 1	30	S	1
											22	Week 11	28	DF	190
											22	Week 11	29	DM	54
											25	Week 1	34	DF	29
											25	Week 1	35	DM	116
											25	Week 1	36	S	0
											25	Week 11	34	DF	27
											25	Week 11	35	DM	196
											25	Week 11	36	S	0
											28	Week 1	40	DF	32
											28	Week 1	41	DM	9
											28	Week 1	42	S	0
											28	Week 11	40	DF	49
											28	Week 11	41	DM	50
											28	Week 11	42	S	0

## Sheet: Clutch number
EXPERIMENT I:	Pair	Group	Treatment	Clutches produced
	1	3	Intruded	2
	2	6	Intruded	2
	3	7	Intruded	2
	4	10	Intruded	3
	5	13	Intruded	0
	6	16	Intruded	0
	7	21	Intruded	2
	8	22	Intruded	0
	9	25	Intruded	3
	10	28	Intruded	0
	1	1	Control	3
	2	4	Control	0
	3	9	Control	2
	4	12	Control	3
	5	15	Control	4
	6	18	Control	3
	7	19	Control	2
	8	24	Control	3
	9	27	Control	0
	10	30	Control	0

## Sheet: Latency to spawn
EXPERIMENT I:	Pair	Group	Treatment	Latency (days)	Female size (mm)	Female size = female standard body length at start of study.
	1	1	Control	7	50
	1	3	Intruded	13	49
	2	6	Intruded	3	58
	3	7	Intruded	14	61
	3	9	Control	42	60
	4	10	Intruded	21	45
	4	12	Control	53	48
	5	15	Control	3	58
	6	18	Control	12	48
	7	19	Control	43	49
	7	21	Intruded	51	49
	8	24	Control	12	55
	9	25	Intruded	4	57

## Sheet: Inter-clutch interval
EXPERIMENT I:	Pair	Group	Treatment	Interval (days)	Female size (mm)	Female size = female standard body length closest in time to when clutch was laid (start or end of study).
	1	1	Control	24	50
	1	1	Control	28	57
	1	3	Intruded	28	58
	2	6	Intruded	44	62
	3	9	Control	24	54
	3	7	Intruded	51	61
	4	12	Control	15	59
	4	12	Control	15	59
	4	10	Intruded	18	45
	4	10	Intruded	22	52
	5	15	Control	12	58
	5	15	Control	13	64
	5	15	Control	20	64
	6	18	Control	26	48
	6	18	Control	30	60
	7	19	Control	13	47
	7	21	Intruded	19	55
	8	24	Control	27	55
	8	24	Control	29	58
	9	25	Intruded	26	57
	9	25	Intruded	24	59

## Sheet: Clutch size
EXPERIMENT I:	Pair	Group	Treatment	Clutch size	Female Size (mm)	Treatment duration (days)	Clutch size = number of eggs.
	1	1	Control	149	50	7	Female size = female standard body length closest in time to when clutch was laid (either start or end of study).
	1	1	Control	93	50	31	Treatment duration = number of days until group laid a clutch.
	1	1	Control	146	57	59
	1	3	Intruded	56	49	13
	1	3	Intruded	134	49	42
	2	6	Intruded	127	58	3
	2	6	Intruded	202	62	47
	3	7	Intruded	155	61	14
	3	7	Intruded	244	61	65
	3	9	Control	53	60	42
	3	9	Control	38	54	66
	4	10	Intruded	72	45	21
	4	10	Intruded	84	45	39
	4	10	Intruded	138	52	61
	4	12	Control	111	59	53
	4	12	Control	91	59	68
	4	12	Control	102	59	83
	5	15	Control	27	58	3
	5	15	Control	48	58	24
	5	15	Control	61	62	57
	5	15	Control	79	62	72
	6	18	Control	70	48	12
	6	18	Control	54	48	38
	6	18	Control	131	60	68
	7	19	Control	28	49	43
	7	19	Control	89	47	56
	7	21	Intruded	46	55	51
	7	21	Intruded	78	55	70
	8	24	Control	108	55	12
	8	24	Control	98	55	39
	8	24	Control	179	58	68
	9	25	Intruded	67	57	4
	9	25	Intruded	145	57	30
	9	25	Intruded	101	59	54

## Sheet: Parental care
EXPERIMENT I:	Pair	Group	Treatment	Clutch visits	Caring events	Time spent in vicinity of clutch (s)	Time in parental-care activities (s)	Clutch size	Treatment duration (days)	Clutch size = number of eggs.
	1	1	Control	17	28	127.24	104.15	146	59	Treatment duration = number of days until group laid a clutch.
	1	1	Control	21	20	100.39	56.64	93	31
	1	1	Control	29	38	134.77	92.28	149	7
	1	3	Intruded	17	10	72.05	32.62	56	13
	1	3	Intruded	34	29	197.07	72.11	134	42
	2	6	Intruded	11	5	20.12	4.87	127	3
	2	6	Intruded	17	23	76.3	52.88	202	47
	3	7	Intruded	32	21	226.21	89.09	244	65
	3	7	Intruded	28	22	110.53	56.06	155	14
	3	9	Control	35	43	305.68	123.46	38	66
	3	9	Control	37	56	183.58	150.59	53	42
	4	10	Intruded	59	87	328.29	257.09	138	61
	4	10	Intruded	27	24	94.72	62.29	84	39
	4	10	Intruded	42	23	141.43	50.88	72	21
	4	12	Control	22	18	199.35	141.63	91	68
	4	12	Control	16	28	95.55	69.94	102	83
	5	15	Control	23	9	99.86	45.53	61	57
	5	15	Control	33	18	184.76	64.79	48	24
	5	15	Control	28	17	145.97	47.62	27	3
	5	15	Control	31	22	174.72	95.3	79	72
	6	18	Control	46	38	190.85	111.59	131	68
	6	18	Control	28	27	131.71	51.54	54	38
	6	18	Control	14	11	86.51	13.71	72	12
	7	19	Control	17	42	130.19	106.15	89	56
	7	19	Control	15	21	79.34	48.67	28	43
	7	21	Intruded	27	27	131.48	64.64	46	51
	7	21	Intruded	40	32	167.49	87.99	78	70
	8	24	Control	19	17	105.2	43.92	179	68
	8	24	Control	18	16	69.31	29.84	98	39
	8	24	Control	37	18	180.16	56.99	108	12
	9	25	Intruded	20	16	141.54	88.39	101	54
	9	25	Intruded	33	24	148.23	81.24	145	30
	9	25	Intruded	11	12	101.26	85.13	67	4

## Sheet: Hatching success
EXPERIMENT I:	Pair	Group	Treatment	Hatching success (%)	Clutch size	Treatment duration (days)	Clutch size = number of eggs.
	1	1	Control	0	149	7	Treatment duration = number of days until group laid a clutch.
	1	1	Control	45.89	146	59
	1	3	Intruded	83.58	134	42
	2	9	Control	77.36	53	42
	3	10	Intruded	59.72	72	21
	3	10	Intruded	21.43	84	39
	3	10	Intruded	39.86	138	61
	3	12	Control	0	111	53
	3	12	Control	0	91	68
	3	12	Control	0	102	83
	4	15	Control	100	27	3
	4	15	Control	95.83	48	24
	4	15	Control	55.74	61	57
	4	15	Control	58.23	79	72
	5	18	Control	59.54	131	68
	6	19	Control	3.57	28	43
	6	19	Control	80.9	89	56
	6	21	Intruded	32.61	46	51
	6	21	Intruded	0	78	70
	7	25	Intruded	71.64	67	4
	7	25	Intruded	79.21	101	54

## Sheet: Offspring surviving to 1 month
EXPERIMENT I:	Pair	Group	Treatment	Surviving offspring	Clutch size	Treatment duration (days)		Surviving offspring = number of offspring surviving to 1 month post hatching.
	1	1	Control	0	149	37		Clutch size = number of eggs.
	1	1	Control	8	93	61		Treatment duration = number of days until offspring reached 1-month of age.
	1	1	Control	36	146	89
	1	3	Intruded	37	56	43
	1	3	Intruded	52	134	72
	2	6	Intruded	60	127	33
	2	6	Intruded	16	202	77
	3	7	Intruded	62	155	44
	3	7	Intruded	24	244	95
	3	9	Control	30	53	72
	3	9	Control	9	38	96
	4	10	Intruded	0	72	51
	4	10	Intruded	11	84	69
	4	10	Intruded	3	138	91
	4	12	Control	0	111	83
	4	12	Control	0	91	98
	4	12	Control	0	102	113
	5	15	Control	10	27	33
	5	15	Control	1	48	54
	5	15	Control	3	61	87
	6	18	Control	20	70	42
	6	18	Control	11	54	68
	6	18	Control	70	131	98
	7	19	Control	1	28	73
	7	19	Control	70	89	86
	7	21	Intruded	10	46	81
	7	21	Intruded	0	78	100
	8	24	Control	17	108	42
	8	24	Control	35	98	69
	9	25	Intruded	17	67	34
	9	25	Intruded	35	145	60
	9	25	Intruded	12	101	84

## Sheet: Offspring behaviour
EXPERIMENT I:	Pair	Group	Treatment	Pre-stimulus activity	Nearest-neighbour distance (cm)	Latency to freeze (s)	Latency to first movement (s)	Offspring tested	Offspring size (mm)	Treatment duration (days)	Pre-stimulus activity = mean proportion of offspring active in the 5 min prior to startle stimulus.
	1	1	Control	0.87	3.22	2	33	8	11.97	61	Latency to freeze = time taken until all test offspring became immobile following startle stimulus.
	1	1	Control	0.55	1.71	2	18	10	9.72	89	Latency to first movement = time taken until the first offspring moved after startle stimulus.
	1	3	Intruded	0.82	2.76	3	42	10	7.73	43	Offspring tested = number of offspring in test chamber.
	1	3	Intruded	0.62	2.9	3	7	10	5.79	72	Treatment duration = number of days from start of experiment until offspring were sampled.
	2	6	Intruded	0.93	2.92	2	12	10	7.57	33
	2	6	Intruded	0.51	1.62	1	20	10	7.44	77
	3	7	Intruded	0.85	3.23	2	28	10	8.22	44
	3	7	Intruded	0.91	2.36	5	6	10	6.09	95
	3	9	Control	0.97	2.38	4	12	10	9.05	72
	3	9	Control	0.39	4.26	1	38	9	8.91	96
	4	10	Intruded	0.93	2.97	3	22	10	9.93	69
	5	15	Control	0.91	3.01	4	13	10	11.51	33
	6	18	Control	0.96	2.84	2	15	10	8.17	42
	6	18	Control	0.84	2.21	2	6	10	7.42	68
	7	19	Control	0.51	3.65	3	58	10	8.71	73
	7	21	Intruded	0.85	3.12	5	15	10	8.38	81
	8	24	Control	0.58	2.2	1	20	10	9.24	42
	8	24	Control	0.27	2.33	2	33	10	9.57	69
	9	25	Intruded	0.82	3.15	2	40	10	9.02	34
	9	25	Intruded	0.79	4.68	2	30	5	7.18	60
	9	25	Intruded	0.39	1.84	2	19	10	6.19	84

## Sheet: Offspring size
EXPERIMENT I:	Pair	Group	Treatment	Mean offspring length (mm)	Mean offspring weight (mg)	Surviving offspring	Treatment duration (days)	Offspring length = average offspring standard body length at 1 month of age.
	1	1	Control	11.97	6.96	8	61	Offspring weight = average offspring dry weight at 1 month of age.
	1	1	Control	9.72	2.82	36	89	Surviving offspring = number of surviving offspring to 1 month of age
	1	3	Intruded	7.73	2.81	37	43	Treatment duration = number of days from start of experiment until offspring were sampled.
	1	3	Intruded	5.79	1.26	52	72
	2	6	Intruded	7.57	3.1	60	33
	2	6	Intruded	7.44	1.2	16	77
	3	7	Intruded	8.22	1.98	62	44
	3	7	Intruded	6.09	2.48	24	95
	3	9	Control	9.05	2.68	30	72
	3	9	Control	8.91	2.8	9	96
	4	10	Intruded	9.93	5.14	11	69
	4	10	Intruded	9.17	7	3	91
	5	15	Control	11.51	8.19	10	33
	5	15	Control	10.59	8.3	1	54
	6	18	Control	8.17	3.09	20	42
	6	18	Control	7.42	2.44	11	68
	7	19	Control	9.37	5.05	1	73
	7	19	Control	8.71	4.73	70	86
	7	21	Intruded	8.38	4.57	10	81
	8	24	Control	9.24	4.32	17	42
	8	24	Control	9.57	6.2	35	69
	9	25	Intruded	9.02	4.59	17	34
	9	25	Intruded	7.18	3.26	35	60
	9	25	Intruded	6.19	2.69	12	84

[truncated: 4 more sheets: Egg volume, Egg dry weight, Egg protein content, Egg lipid content]
